# Supplementary material
Source: publisher figshare collection journal article supplement (https://gsajournals.figshare.com/ndownloader/files/19354610)
Supplement: Supplementary file 1 [file 19354610]

## Sheet: Sheet1
A. Chromosomal mutations
Genome Position	Strains
	S1	S2	S3	S4	S5	S6	S7	S9	S10	S11	S12	S13	S14	S15	S16	S17	S18	S19	S20	S21	S22	S23	S24	S25	S26	S27	S28	S29	S30	S31	S32	S33	S34	A57	A58	A59	A60	A61	A62	U0	U1	U2	U3	U4	U5	U6	U7	U8	U9
25011																													O
210315																													O
246498																													—
325690																																					X
321734
348225						X
352514																						—
361016						X
390319						—
412530
468229																						X
484440																																		X
522650																									O
544714																						X
548895																																					X
583629																													X
589722																																													O
595180																																					O
621794						O
644567																						O
701487						O
731915																													—
741599																													—
765696																																					—
831722					X
877345																													X
911191																													O
941917																																												X
1037588																						X
1188247																																					O
1239096						X
1297110																																					X
1550681																													X
1945914																													O
1975910																													—
1977784																													X
1990505																													—
1998311																													X
2001624																													O
2016822						—
2031612																													—
2067714						—
2094817																													—
2185160																													X
2195927																													X
2241207																													O
2246858																													X
2272520																													X
2354456																													O
2362124																												X
2380449																																					—
2380920						X
2435965																													O
2453328																													—
2563287																																					O
2614704																																					X
2628552																													—
2631976																						X
2644091																						X
2662060																																					—
2699517																													O
2714524																													X
2726442																													X
2751626																													X
2775100																													O
2775464																													—
2815107																													O
2824649																													O
2833584																													—
2850329						—
2857380																													X
2899817																													O
2968853																																					—
3002626						—
3005067																													X
3022613
3042562																													X
3062342						O
3069137																													X
3102703																													O
3109647																													X
3126134																													—
3139841						X
3165448																													—
3169680																													X
3180810																													—
3200716																																					O
3218461																													—
3249293																													O
3253003																																					X
3255974																													—
3264753																													O
3286963								X
3322804																													O
3347909						O
3365173																													—
3384415																													X
3408951																																					O
3409233																																					X
3409564						—
3419669																													O
3425117																													X
3426370						O
3437181																																					X
3486359																																											X
3502151																													X
3502287																													—
3513048																													—
3521414						—																							—
3537835						—
3578425																						X
3599579																													—
3603761																						X
3605015																													X
3613126																													X
3617331																						X
3630485																													—
3631045																													O
3638920																													—
3652294
3659760																																					—
3677134																													O
3686676																													O
3690417						X
3690515						—
3692072																													—
3701632																													—
3709716																						X
3712174																													—
3723247																						X
3734858																													—
3735463																						X
3736868																													O
3744239																																					X
3747070																												X
3751231																													X
3758858																													—
3760062																																					X
3769359																													X
3774566																													O
3779845																						—
3782339																													X
3791638																													O
3791672																													—
3794166																													—
3795987																													X
3816544																																					X
3832767																													—
3834018																													O
3840685																													X
3846965																													X
3847571																													X
3849498																						X
3855956																													—
3855989																																															X
3856004																													X
3856815																													—
3867708																													—
3872110																													X
3874637																						X
3876519																						X
3898463		X																								X		X	X	X	X	X		X		X	X		X
3911649																													X
3918063																													—
3960631																													O
3967996																																										X
3983583																																					X
3993333
4005689																						X
4006256																													O
4006539																													—
4041170																													X
4054772																													—
4072749			X
4089238																													—
4150595																																			O
4158822																													X
4177562																						X
4209533																													—
4276268																													—
4300625																													X
4320216						O
4382594						X
4385490						X
4405418																						—
4405483						X
4412170																													—
4432041																																												X
4441950																																X
B. Plasmid mutations
Plasmid Position	Strains
	S1	S2	S3	S4	S5	S6	S7	S9	S10	S11	S12	S13	S14	S15	S16	S17	S18	S19	S20	S21	S22	S23	S24	S25	S26	S27	S28	S29	S30	S31	S32	S33	S34	A57	A58	A59	A60	A61	A62	U0	U1	U2	U3	U4	U5	U6	U7	U8	U9
7156																																			X
9895																																			—
11321																																			X
11935																																			O
12680																													O
13014
13685																												O
15779																									O
20587																																			X
20652																																					O
21840																					O
24283																																			X
24304																													—
26608																																			O
26766																													X
31150																													—
31522																													—
31669																													X
33265																																			X
34634																																							X
34959																																					—
36630																													X
39504																																							X
40407																																			X
41233																					X
42130						X
45041																																			X
52181																											X
52184																											O
54704																																			X
55412																																			—
56586																																			X
57617																																							X
57732																																					O
58438																																			—
59042																																					X
62108																																			X
62442																																					—
64707								—
66212																													O
66555																																					—
66955																																							X
70034																													—
72725																																			O
73834																																		—
74246																						—
74349																													X
74501																																							X
74781																																						—
76951																																			—
80600						—
80619																O
81143						—
81345						X
82221																																			—
83707																																			O
85521																																			O
85706																																			X
88360																													X
89524																													X
90933																																			—
96974																													—
97152										X
97224																													—
101782																																			—
102593																																							X
103211																																							X
105100																																			—
105316						—
112521																													X
115783																																							X
117171						X
119610																					O
123045																																			—
123838																																			X
126175						—
126309																													X
127887																													—
129529																													—
130615						X
133108						—
134318																																					—
136838
139750																									O
143470								—
146690																																							X
148892																																							O
149390																													X
149584																									X
150171													O
150180																																	+
150206												—
150210		—
150230																—	—
150235																																		—		—
150240																														—
150243																							—
150249																					—
150257														+
150258					+
150264			—
150271	—			—		—	—	—	—	—			—		—			—	—	—		—		—	—	—	—	—	—		—	—			—		—	—	—
150272											—
158066																									O
159254																													O
161224																																							O
161684																																																X
161824
162365																									O
165605																					O
168175																													—
168609																									X
175054																													X
175294																																			—
177065						—
177498	—
178452																													—
180040	—
180866																																			—
182124																									O
183406																																							X
184474						X
184595																																							X
184634																																							X
189105																																			X
189274						X
189536																																							X
191405																																			O
193070																									O
193342																				+
197295																													—
197600																																			—
203056																																			—
203978																									O
204082																																			X
205433																																							X
206860																													O
207550																																							X
208727																																							O
210079																													—
210820																																							X
212507																													X
214037																													—
214548	O
[truncated: 15 more columns]
